# Supplementary material for: Palmitic Acid-BSA enhances Amyloid-β production through GPR40-mediated dual pathways in neuronal cells: Involvement of the Akt/mTOR/HIF-1α and Akt/NF-κB pathways
Source: PubMed Central journal article supplement (PMC5489526; doi:10.1038/s41598-017-04175-w), 2017-06-28
Supplement: 41598_2017_4175_MOESM1_ESM.pdf [file 41598_2017_4175_MOESM1_ESM.pdf]

## Supplementary information

### **Palmitic Acid-BSA enhances Amyloid- $\beta$ production through GPR40-mediated dual pathways in neuronal cells: Involvement of the Akt/mTOR/HIF-1 $\alpha$ and Akt/NF- $\kappa$ B pathways**

Jeong Yeon Kim<sup>1,2,#</sup>, Hyun Jik Lee<sup>1,2,#</sup>, Sei-Jung Lee<sup>3,#</sup>, Young Hyun Jung<sup>1,2</sup>, Dae Young Yoo<sup>2,4</sup>, In Koo Hwang<sup>2,4,5</sup>, Je Kyung Seong<sup>2,4,5</sup>, Jung Min Ryu<sup>6</sup>, and Ho Jae Han<sup>1,2,\*</sup>

<sup>1</sup>Department of Veterinary Physiology, College of Veterinary Medicine, Research Institute for Veterinary Science, Seoul National University, Seoul 08826, Republic of Korea.

<sup>2</sup>BK21 PLUS Program for Creative Veterinary Science Research Center, Seoul National University, Seoul 08826, Republic of Korea.

<sup>3</sup>Department of Pharmaceutical Engineering, Daegu Haany University, Gyeongsan 38610, Republic of Korea.

<sup>4</sup>Department of Anatomy and Cell Biology, College of Veterinary Medicine, Research Institute for Veterinary Science, Seoul National University, Seoul 08826, Republic of Korea.

<sup>5</sup>Korea Mouse Phenotyping Center (KMPC), Seoul 08826, Republic of Korea.

<sup>6</sup>Department of Veterinary Physiology, College of Veterinary Medicine, Chonnam National University, Gwangju 61186, Korea.

\*Corresponding author: Ho Jae Han, D.V.M., Ph.D.

Department of Veterinary Physiology, College of Veterinary Medicine, Seoul National University, Gwanak-ro 1, Gwanak-gu, Seoul, 08826, South Korea

E-mail: hjhan@snu.ac.kr; Tel: 82-2-880-1261; Fax: 82-2-885-2732

# The first three authors contributed equally to this work.

## Keywords

Alzheimer's disease; palmitic acid; amyloid- $\beta$ ; HIF-1 $\alpha$ ; NF- $\kappa$ B

## Supplementary figure legends

### Supplementary Figure S1. Irrelevance of GPR120 in PA-BSA-induced A $\beta$ production.

(a) mRNA expressions of *GPR40*, *GPR120* and *ACTB* were showed with PCR analysis. (b). SK-N-MC cells were transfected with *GPR120* and NT siRNAs prior to incubation with PA-BSA (50  $\mu$ M). Protein expression levels of APP, C99 and BACE1 were assessed with western blotting. Data are reported as a mean  $\pm$  S.E.M.  $n = 4$ . Each blot result shown is representative image. \* $p < 0.05$  versus control.

### Supplementary Figure S2. Effect of PA-BSA on intracellular calcium release, ROS production, PKC phosphorylation.

(a) SK-N-MC cells were treated with PA-BSA (50  $\mu$ M), and released calcium level was assessed using Fluo3AM staining. (b) SK-N-MC cells were incubated with 50 $\mu$ M of PA-BSA for 24 h, and ROS production level was analyzed with DCF-DA staining. Data are presented as a mean  $\pm$  S.E.M.  $n = 6$ . (c) SK-N-MC cells were incubated with PA-BSA (50  $\mu$ M) for 0-48 h. The phosphorylation of pan PKC was assessed with western blot. Data are presented as a mean  $\pm$  S.E.M.  $n = 3$ . Each blot result shown is representative image. N.S means not significant.

### Supplementary Figure S3. Role of GPR40 receptor signaling activated by PA-BSA in the phosphorylation of p70S6K1 and NF- $\kappa$ B.

(a-c) SK-N-MC cells were pre-treated with GW1100 (10  $\mu$ M) for 30 min prior to for 24 h. p-GSK3 $\beta$  (Ser9), p-p70S6K1 (Thr389), p70S6K1, p-NF- $\kappa$ B p65 (Ser536), NF- $\kappa$ B p65 and  $\beta$ -actin were analyzed by western blot. Data are reported as a mean a mean  $\pm$  S.E.M.  $n = 4$ . Each blot result shown is representative image. \* $p < 0.05$  versus control, # $p < 0.05$  versus PA-BSA treatment.

### Supplementary Figure S4. Effect of *HIF1A* siRNA transfection on HIF-1 $\alpha$ expression induced by PA-BSA.

SK-N-MC cells were transfected with *HIF1A* and NT siRNAs for 12 h prior to incubation of PA-BSA

(50  $\mu$ M) for 24 h. The expressions of HIF-1 $\alpha$  and  $\beta$ -actin were analyzed by western blot. Data are reported as a mean  $\pm$  S.E.M.  $n = 3$ . \* $p < 0.05$  versus control, # $p < 0.05$  versus PA-BSA treatment.

**Supplementary Figure S5. Role of Akt activated by PA-BSA induced-GSK3 $\beta$  phosphorylation.**

SK-N-MCs were pre-treated with Akt inhibitor (1  $\mu$ M) for 30 min prior to PA-BSA treatment (50  $\mu$ M) for 24 h. Cells were blotted with p-GSK3 $\beta$ , p-Tau (Thr212), p-Tau (Ser396), Tau and  $\beta$ -actin. Data are presented as a mean  $\pm$  S.E.M.  $n = 3$ . Each blot images are representative. . \* $p < 0.05$  versus control, # $p < 0.05$  versus PA-BSA treatment.

**Supplementary Figure S6. Effect of *APP* and *BACE1* siRNAs transfection on expressions of APP and BACE1.**

(a) SK-N-MC cells were transfected with *APP* and NT siRNAs for 12 h prior to incubation of PA-BSA (50  $\mu$ M) for 24 h. The expressions of APP and  $\beta$ -actin were analyzed by western blot. Data are reported as a mean  $\pm$  S.E.M.  $n = 4$ . (b) SK-N-MC cells were transfected with *BACE1* and NT siRNAs for 12 h prior to treatment of PA-BSA (50  $\mu$ M) for 24 h. The expressions of BACE1 and  $\beta$ -actin were assessed with western blot. Data are presented as a mean  $\pm$  S.E.M.  $n = 4$ . Each blot result shown is representative image. \* $p < 0.05$  versus control, # $p < 0.05$  versus PA-BSA treatment.

**Supplementary Figure S7. Full-length western blot images of mice brain samples in the figure 1b.**

All western blot images are full-length blot images of all mice brain samples in the figure 1b.

Dash line box indicates cropped blot image in the figure 1b.

**Supplementary Figure S8. Full-length western blot images for brain samples in the figure 1e.**

All western blot images are full-length blot images of all mice brain samples in the figure 1e.

Dash line box indicates cropped blot image in the figure 1e.

**Supplementary Figure S9. Full-length western blot images for key data in the figure 2.**

All western blot images are full-length blot images of key blot data in the figures 2. Dash line box indicates cropped blot image in the figure 2.

**Supplementary Figure S10. Full-length western blot images for key data in the figure 3.**

All western blot images are full-length blot images of key blot data in the figure 3. Dash line box indicates cropped blot image in the figure 3.

**Supplementary Figure S11. Full-length western blot images for key data in the figure 4.**

All western blot images are full-length blot images of key blot data in the figure 4. Dash line box indicates cropped blot image in the figure 4.

**Supplementary Figure S12. Full-length western blot images for key data in the figure 5.**

All western blot images are full-length blot images of key blot data in the figure 5. Dash line box indicates cropped blot image in the figure 5.

**Supplementary Figure S13. Full-length western blot images for key data in the figure 6.**

All western blot images are full-length blot images of key blot data in the figure 6. Dash line box indicates cropped blot image in the figure 6.

**Supplementary Figure S14. Full-length western blot images for key data in the figure 7.**

All western blot images are full-length blot images of key blot data in the figure 7. Dash line box indicates cropped blot image in the figure 7.

Supplementary figures

**a**

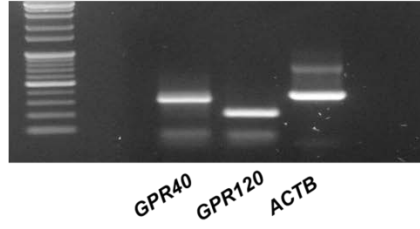

**b**

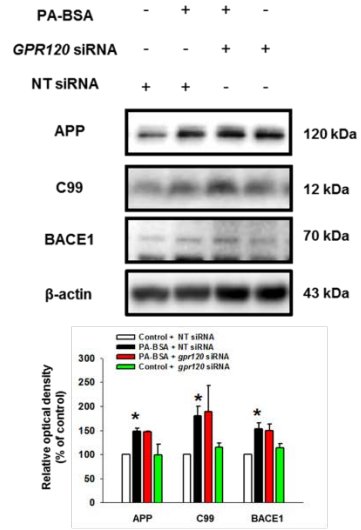

Sup. Fig. S1

**a**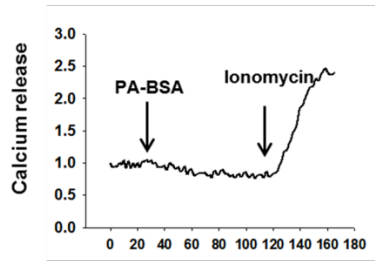**b**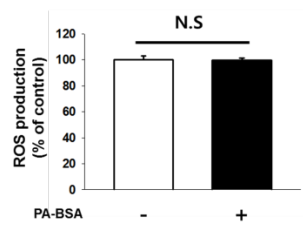**c**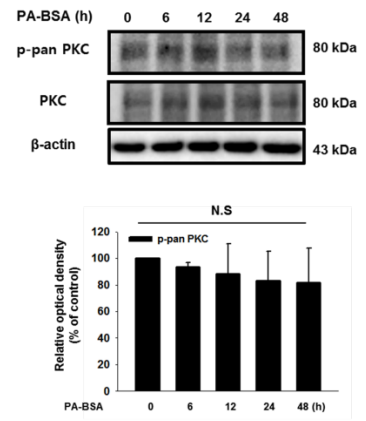**Sup. Fig. S2**

**a**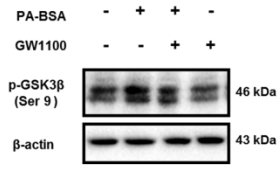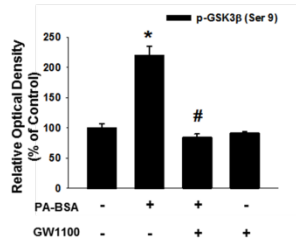**b**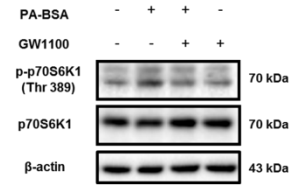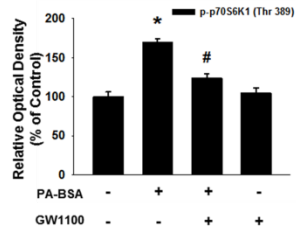**c**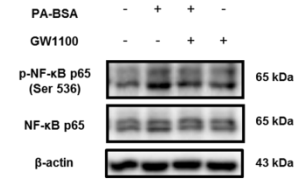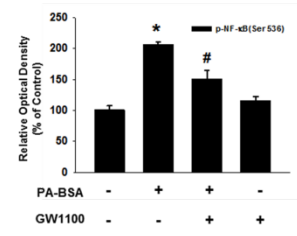**Sup. Fig. S3**



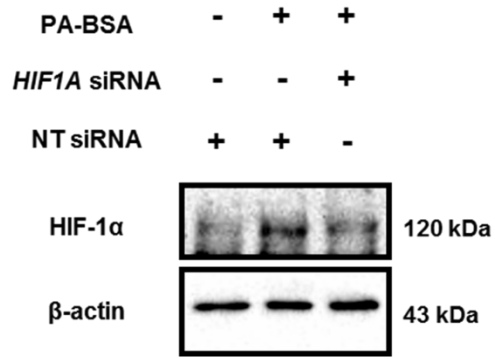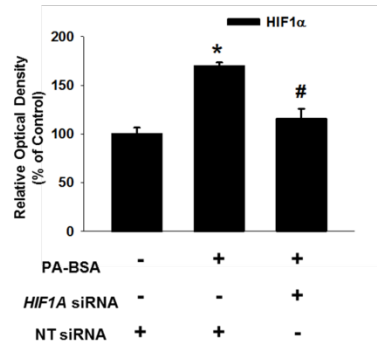

Sup. Fig. S4

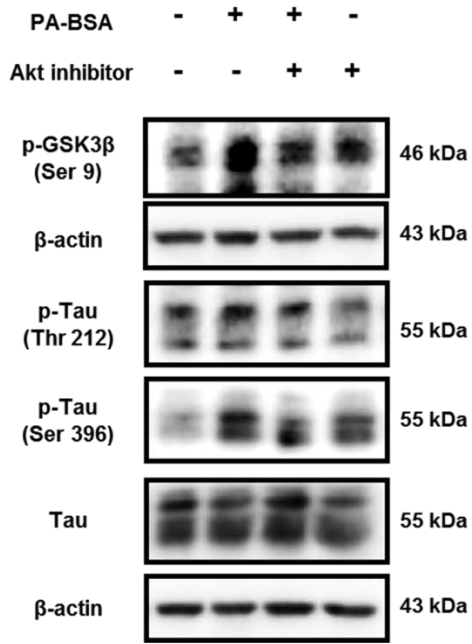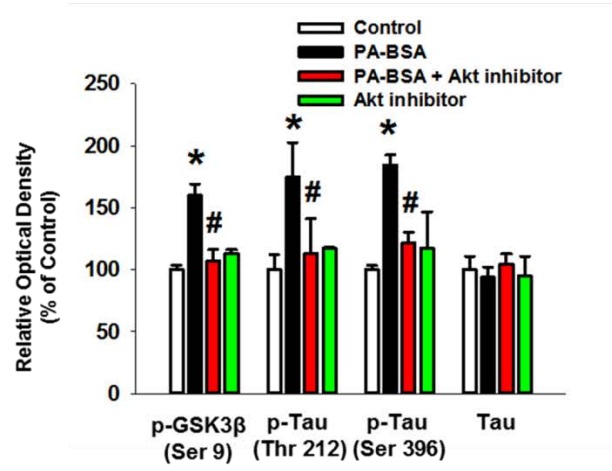

Sup. Fig. S5

**a**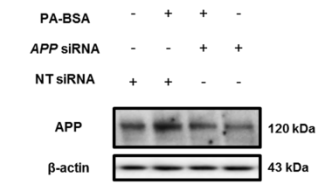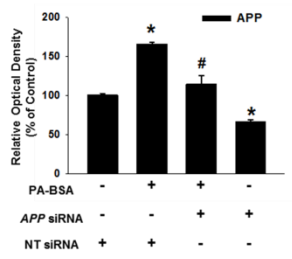**b**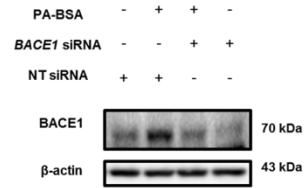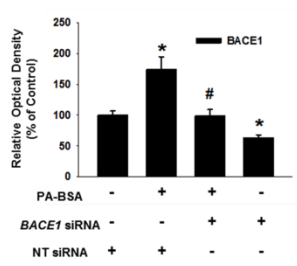**Sup. Fig. S6**

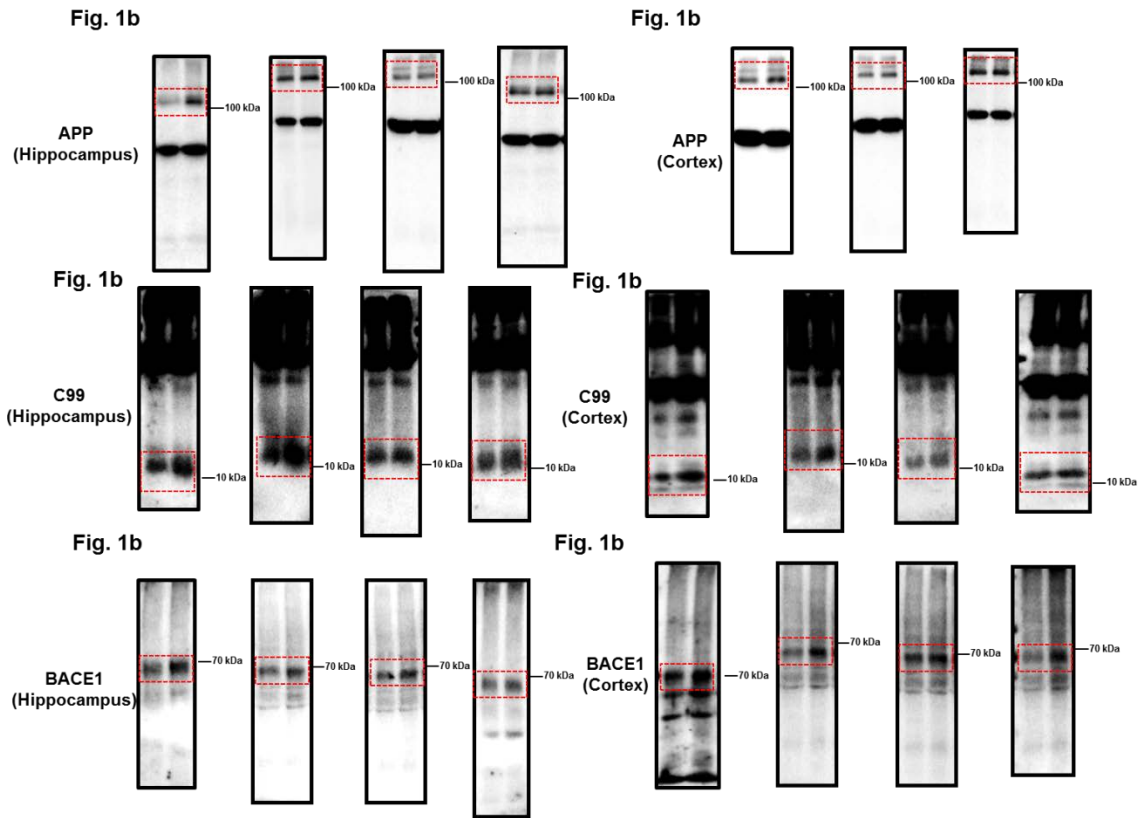

Sup. Fig. S7

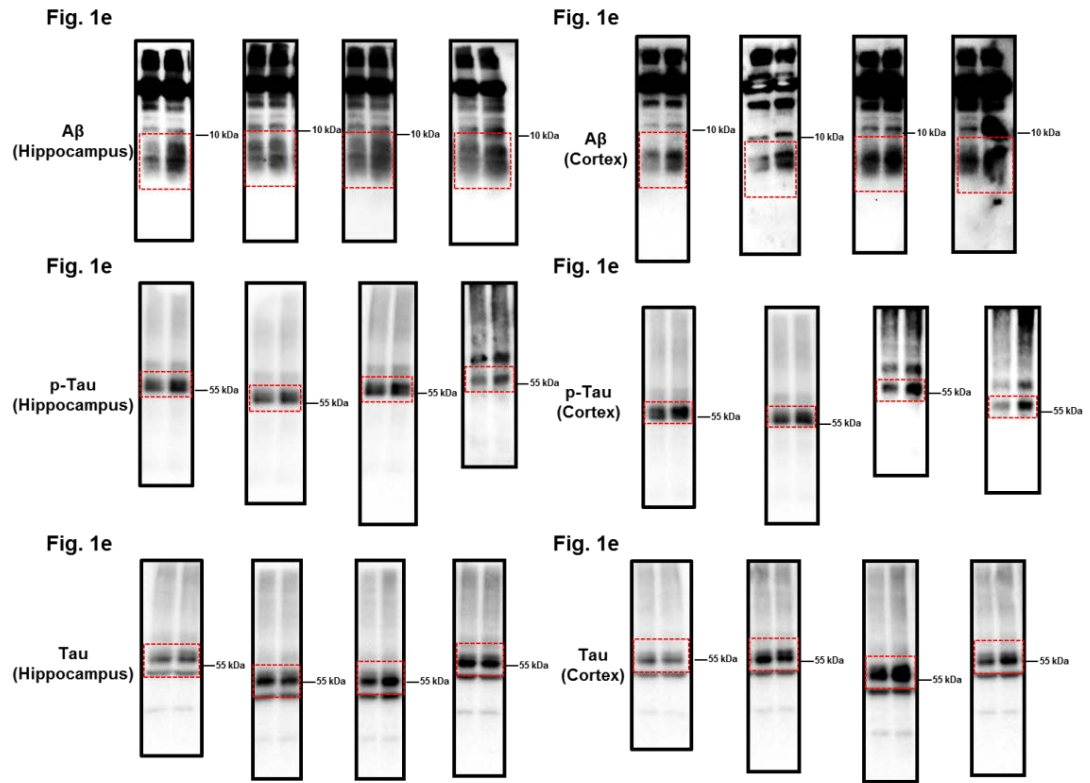

Sup. Fig. S8

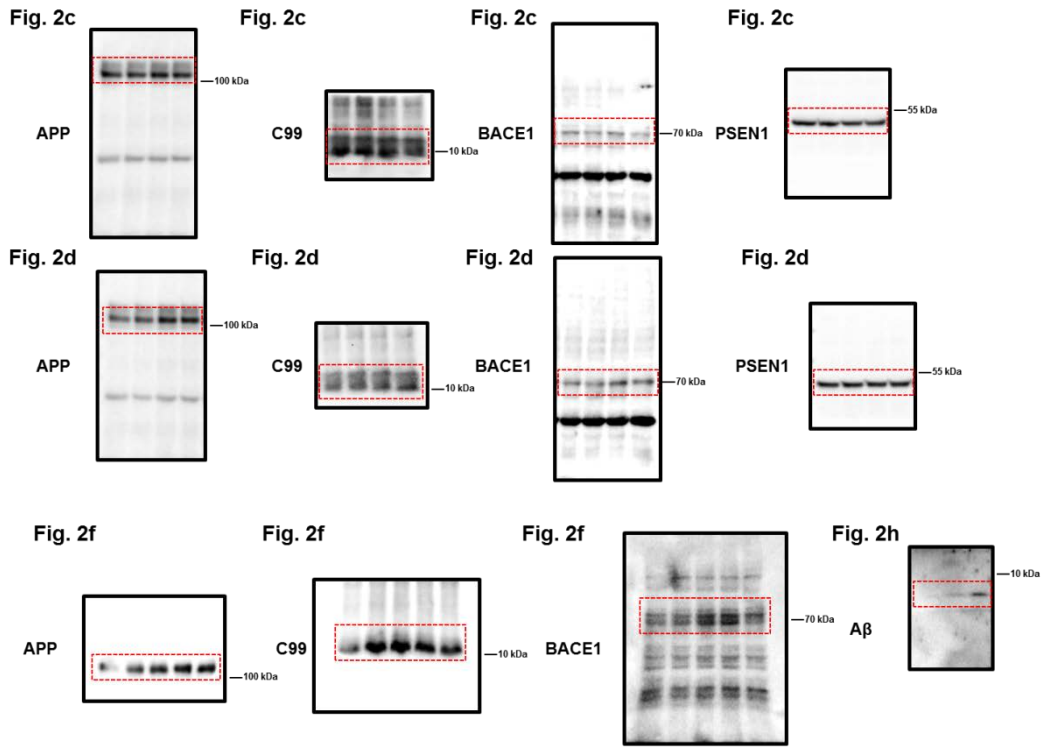

Sup. Fig. S9

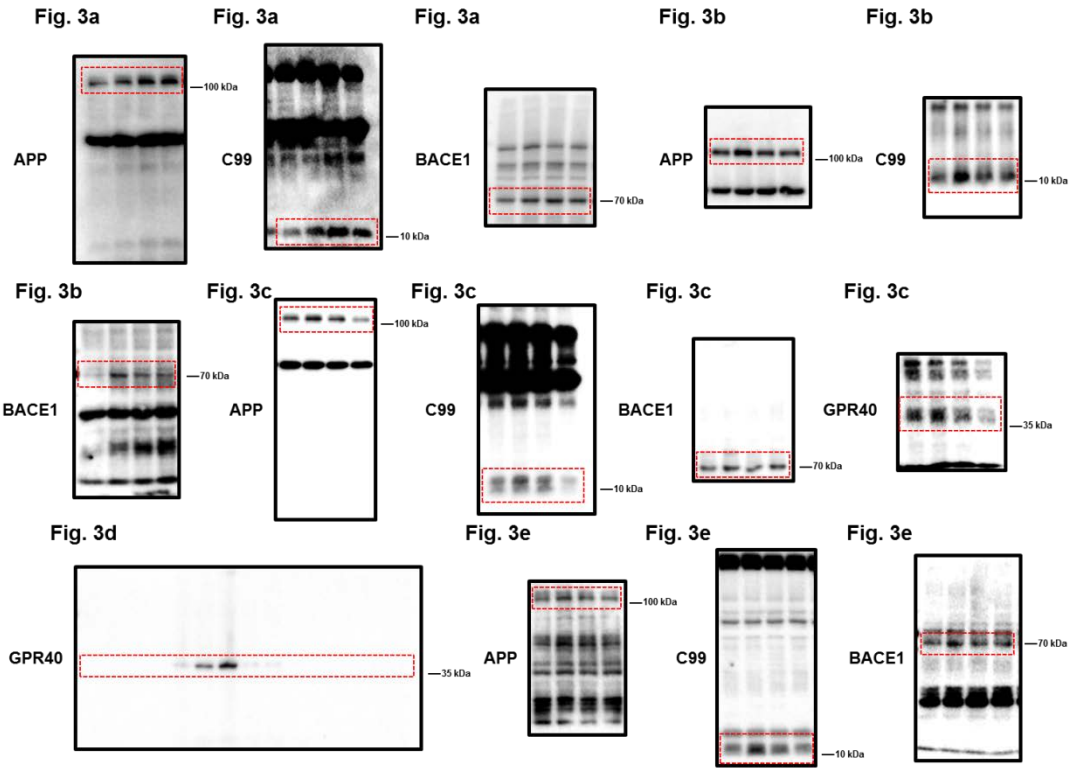

Sup. Fig. S10

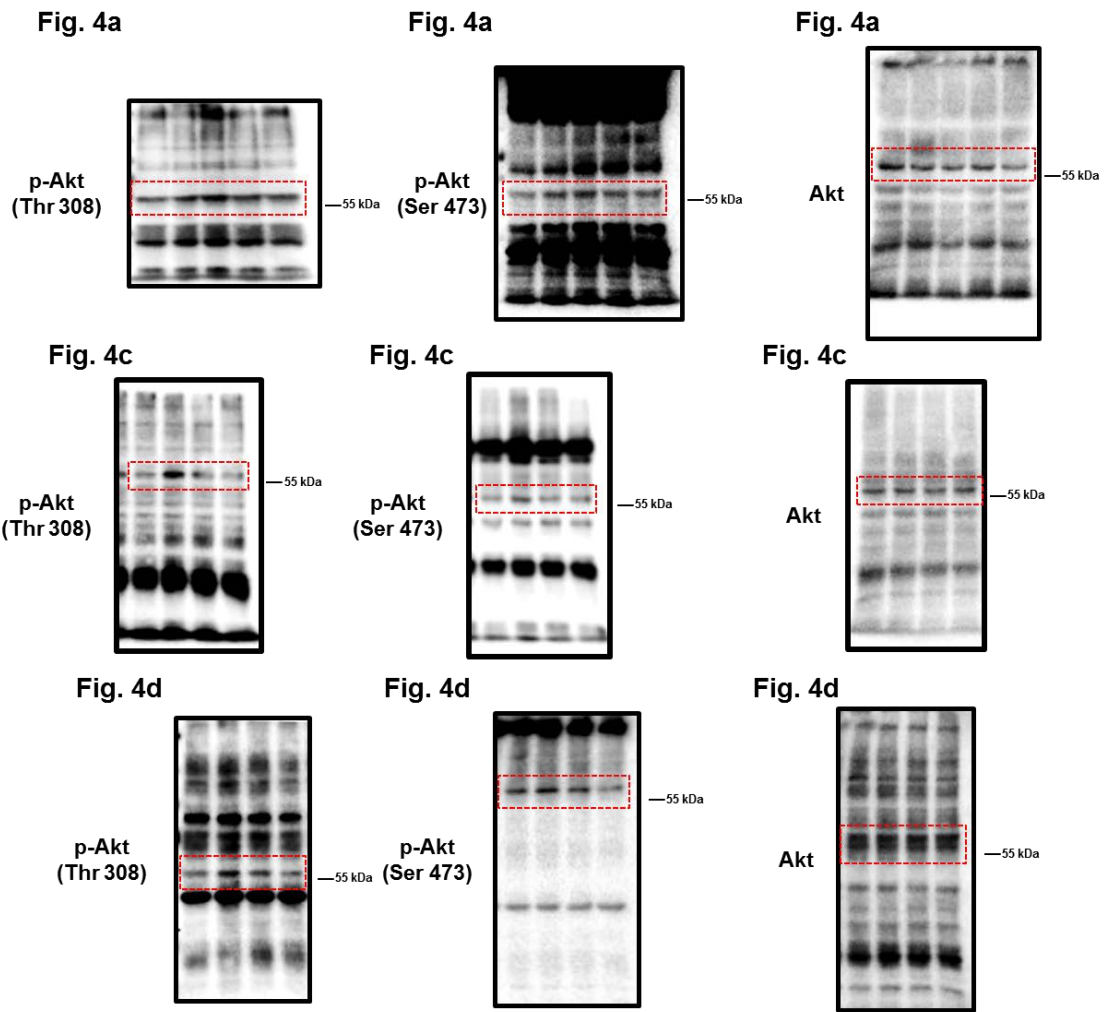

Sup. Fig. S11



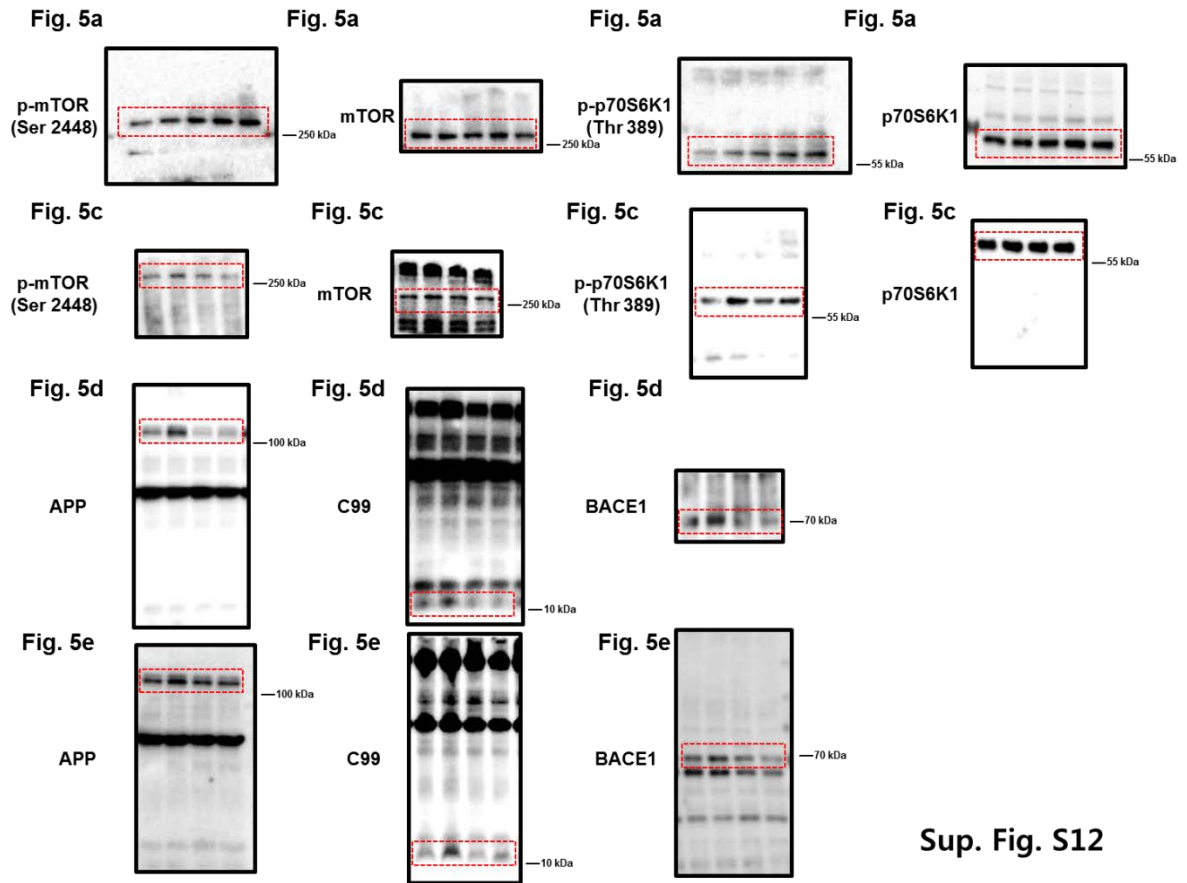

Sup. Fig. S12

Fig. 6a

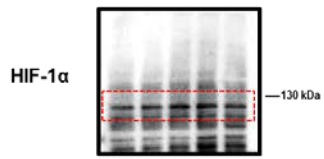

Fig. 6b

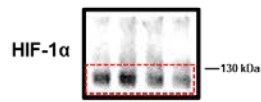

Fig. 6c

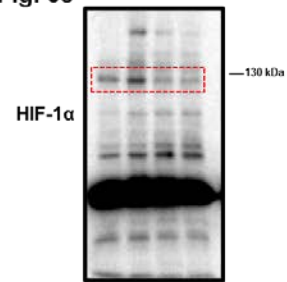

Fig. 6d

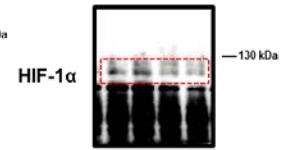

Fig. 6e

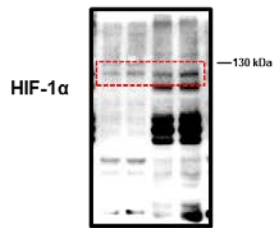

Fig. 6h

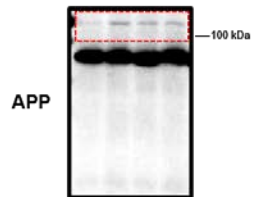

Fig. 6h

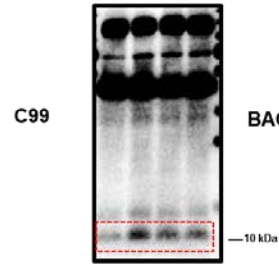

Fig. 6h

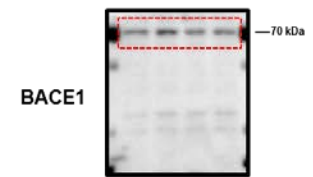

Sup. Fig. S13

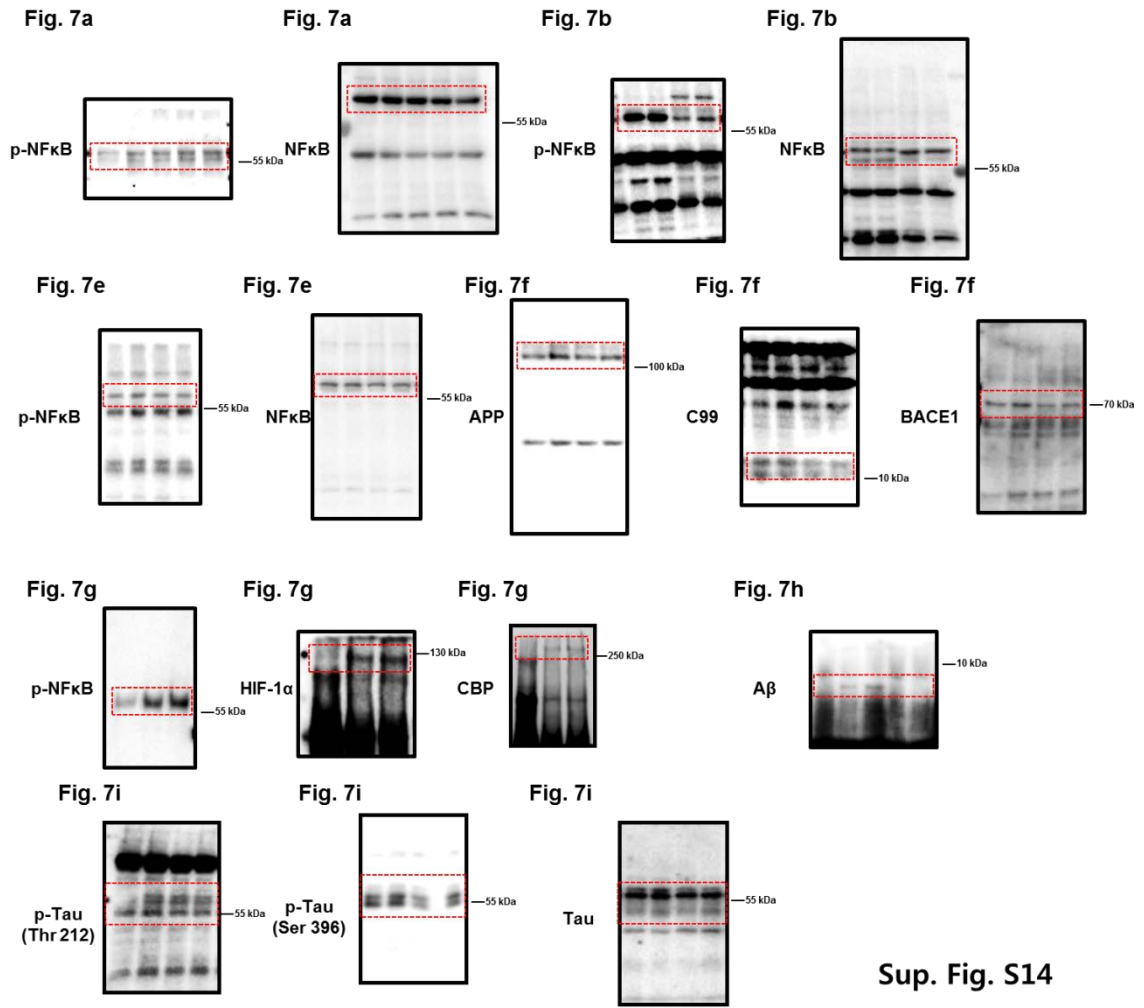

Sup. Fig. S14

**Supplementary Table S1. Sequences of primers used for RT-PCR and real-time PCR**

| Gene name     | Species | Identification | Sequence (5'-3')       | Size (bp) |
|---------------|---------|----------------|------------------------|-----------|
| <i>GPR40</i>  | Human   | Sense          | CTGGTCTACGCCCTGAACCT   | 316       |
|               |         | Antisense      | GAGCCTCCAACCCAAAGACC   |           |
| <i>GPR120</i> | Human   | Sense          | CTTCTTCTCCGACGTCAAGG   | 201       |
|               |         | Antisense      | GGGATAGCGCTGATGAAGAG   |           |
| <i>ACTB</i>   | Human   | Sense          | AACCGCGAGAAGATGACC     | 351       |
|               |         | Antisense      | AGCAGCCGTGGCCATCTC     |           |
| <i>APP</i>    | Human,  | Sense          | TAGAAGTAGCAGAGGAGGAAG  | 244       |
|               | Mouse   | Antisense      | TACCAGCGGGAGATCATT     |           |
| <i>BACE1</i>  | Human   | Sense          | CTGCCTGGATTTCTTCCTATTA | 255       |
|               |         | Antisense      | CTTGTGGTGGAGGACATAAG   |           |
| <i>GAPDH</i>  | Human   | Sense          | GTCCACCACTGACACGTTG    | 156       |
|               |         | Antisense      | GGGAAACTGTGGCGTGAT     |           |
| <i>Bace1</i>  | Mouse   | Sense          | ACATATCGAGACCTCCGAAAGG | 149       |
|               |         | Antisense      | AACTTGTCCGATTCAGTGATGG |           |
| <i>Actb</i>   | Mouse   | Sense          | GCAGGAGTACGATGAGTCCG   | 239       |
|               |         | Antisense      | ATCCTGAGTCAAAAGCGCCA   |           |

**Supplementary Table S2. Sequences of siRNAs used for gene silencing**

| Target gene   | Sequences 5'-3'                                                                           | Manufacturer |
|---------------|-------------------------------------------------------------------------------------------|--------------|
| <i>APP</i>    | GGUGGGCGGUGUUGUCAUA<br>GGUUCUGGGUUGACAAAUA<br>CGGAAACGAUGCUCUCAUG<br>CUAUUCAGAUGACGUCUUG  | Dharmacon    |
| <i>BACE1</i>  | GCAAGGAGUACAACUAUGA<br>GGAGGGAGCAUGAUCAUUG<br>UAUGGGAGCUGUUAUCAUG<br>AGACGACUGUUACAAGUUU  | Dharmacon    |
| <i>GPR40</i>  | CGCUCAACGUCCUGGCCAU<br>GUGACCGGUACUUGGGAA                                                 | Dharmacon    |
| <i>GPR120</i> | GAAAUGACUUGUCGAUUUAU<br>CAAGAGCUGUCGUGACUCA<br>GGACUGGUCAUUGUGAUCA<br>GGAAGAGGCUCACGGUAAG | Dharmacon    |
| <i>HIF1A</i>  | GCCGCUCAAUUUUAUGAAUATT<br>UAUUCAUAAAUUGAGCGGCTT                                           | Dharmacon    |
| Non-targeting | UAGCGACUAAACACAUCAA<br>UUGAUGUGUUUAGUCGCUA                                                | Dharmacon    |

**Supplementary Table S3. Sequences of CHIP primers used for RT-PCR and real-time PCR**

| Gene                                     | Identification | Sequence (5'-3')     | Size (bp) |
|------------------------------------------|----------------|----------------------|-----------|
| <i>APP</i> promoter for HIF-1 $\alpha$   | Forward        | ACTCTCCCTCCCACTGTTCA | 178       |
|                                          | Reverse        | CACCCGAGAGAGACCCCTAG |           |
| <i>BACE1</i> promoter for HIF-1 $\alpha$ | Forward        | ACCACCTTCTCCCACTGAGT | 161       |
|                                          | Reverse        | CAGGCGCTGGAGATACAGAG |           |
| <i>APP</i> promoter for NF- $\kappa$ B   | Forward        | ACTCTCCCTCCCACTGTTCA | 178       |
|                                          | Reverse        | CACCCGAGAGAGACCCCTAG |           |
| <i>BACE1</i> promoter for NF- $\kappa$ B | Forward        | CTGACAGACGGGAGGTGTG  | 174       |
|                                          | Reverse        | GGTTTTCGCTTTTCCCTGGG |           |
